# Supplementary material for: Environmental pollution liability insurance pilot policy and enterprise green transformation: evidence from Chinese listed corporates
Source: Frontiers journal article supplement (doi:10.3389/fevo.2023.1294160), 2023-11-17
Supplement: Table_1.docx [file Table_1.docx]

# Appendix

Appendix A1. Database of keywords for green development concerns

| **Term** | **Keywords** |
| --- | --- |
| Development Concept | Low Carbon Economy, Circular Economy, Green Economy, Ecological Civilization Demonstration Zone, Eco-city |
| Green Production | High Energy Consumption, Energy Conservation and Emission Reduction, Water Conservation and Irrigation, Industrial Water Conservation, Green Manufacturing, Consumption Reduction, Agricultural Surface Pollution |
| Green Life | Household Waste, Green Consumption, Green Travel, Toilet Revolution |
| Green Ecology | Mountain forest restoration, afforestation, water conservation, green water and mountains |
| Institution Building | Joint prevention and control, local legislation, public participation, environmental regulatory mechanisms, green governance |
